# Supplementary material for: FruitFire: a luciferase based on a fruit fly metabolic enzyme
Source: PubMed Central journal article supplement (PMC10327219; doi:10.1101/2023.06.30.547126), 2023-06-30
Supplement: media-1.pdf [file media-1.pdf]

Supporting Information for

**FruitFire: a luciferase based on a fruit fly metabolic enzyme**

Spencer T. Adams, Jr., Jacqueto Zephyr, Markus F. Bohn, Celia Schiffer and Stephen C. Miller\*

Department of Biochemistry and Molecular Biotechnology, UMass Chan Medical School, 364 Plantation St, Worcester, MA 01605

[Stephen.miller@umassmed.edu](mailto:Stephen.miller@umassmed.edu)

Table of Contents:

|                           |      |
|---------------------------|------|
| Supplementary Figures 1-6 | S2-7 |
| Supplementary Table 1     | S8   |

A

| Mutant # | ASGG<br>(312-315) | F → L<br>(285) | TTSA<br>(344-347) | LCGG<br>(312-315) | TETTSA<br>(342-347) | A → G<br>(245) | T → R<br>(219) |
|----------|-------------------|----------------|-------------------|-------------------|---------------------|----------------|----------------|
| 1        | •                 | •              |                   |                   |                     |                |                |
| 2        | •                 |                |                   |                   |                     |                |                |
| 3        | •                 |                | •                 |                   |                     |                |                |
| 4        |                   |                |                   | •                 |                     |                |                |
| 5        |                   |                |                   |                   | •                   | •              | •              |
| 6        |                   |                |                   |                   | •                   | •              |                |
| 7        |                   |                |                   |                   | •                   |                |                |
| 8        | •                 | •              |                   |                   | •                   | •              | •              |
| 9        | •                 | •              |                   |                   | •                   | •              |                |
| 10       | •                 |                |                   |                   | •                   | •              | •              |
| 11       | •                 | •              |                   |                   | •                   |                | •              |

B

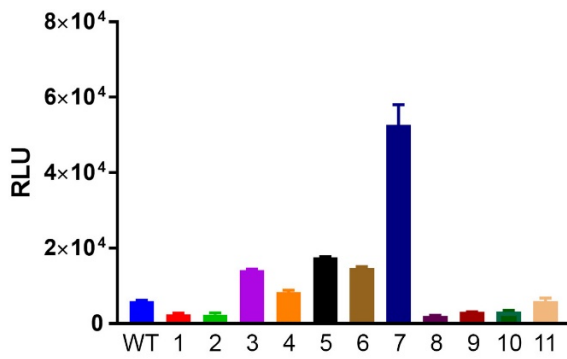

C

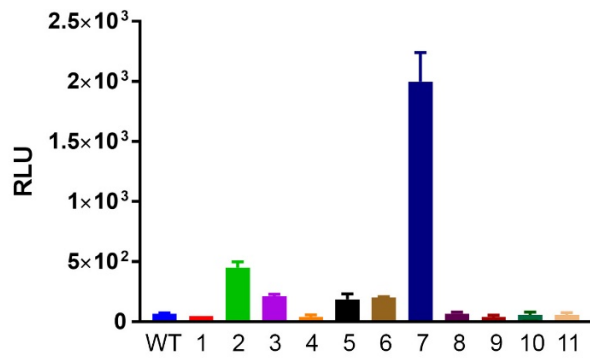

**Supplementary Figure S1. *In vitro* activity of CG6178 active site mutants with CycLuc2 and D-luciferin.** A) Residues in CG6178 highlighted in Figure 2 were replaced with the corresponding Fluc sequence in various combinations as shown. CG6178 and mutants 1-11 (40 nM) were mixed with 250  $\mu$ M of B) CycLuc2 or C) D-luciferin and light emission was measured with a Promega GloMax.

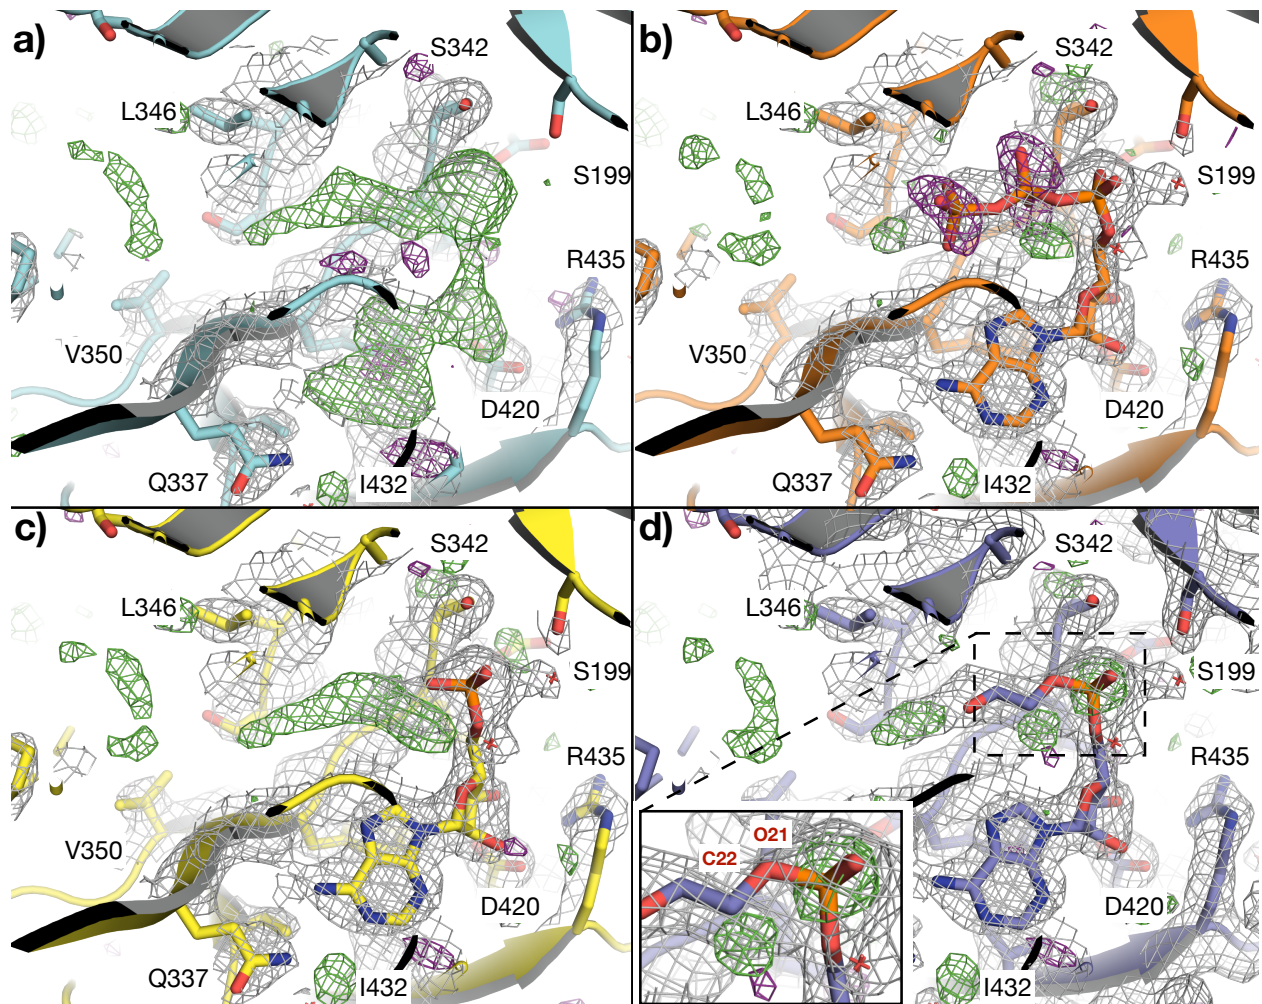

**Supplementary Figure S2: ATP, AMP, and an adenylated ethylene glycol are insufficient to satisfy the density in the active site of CG6178.** (a) The active site of CG6178 with no ligand modeled. (b) ATP, (c) AMP, and (d) an adenylated ethylene glycol molecule modeled in the ligand electron density. CG6178 is shown in cartoon representation. The 2Fo-Fc map (grey, at  $\sigma = 1$ ) and Fo-Fc difference maps (green  $\sigma = +3.0$  and purple  $\sigma = -3.0$ ) are shown.

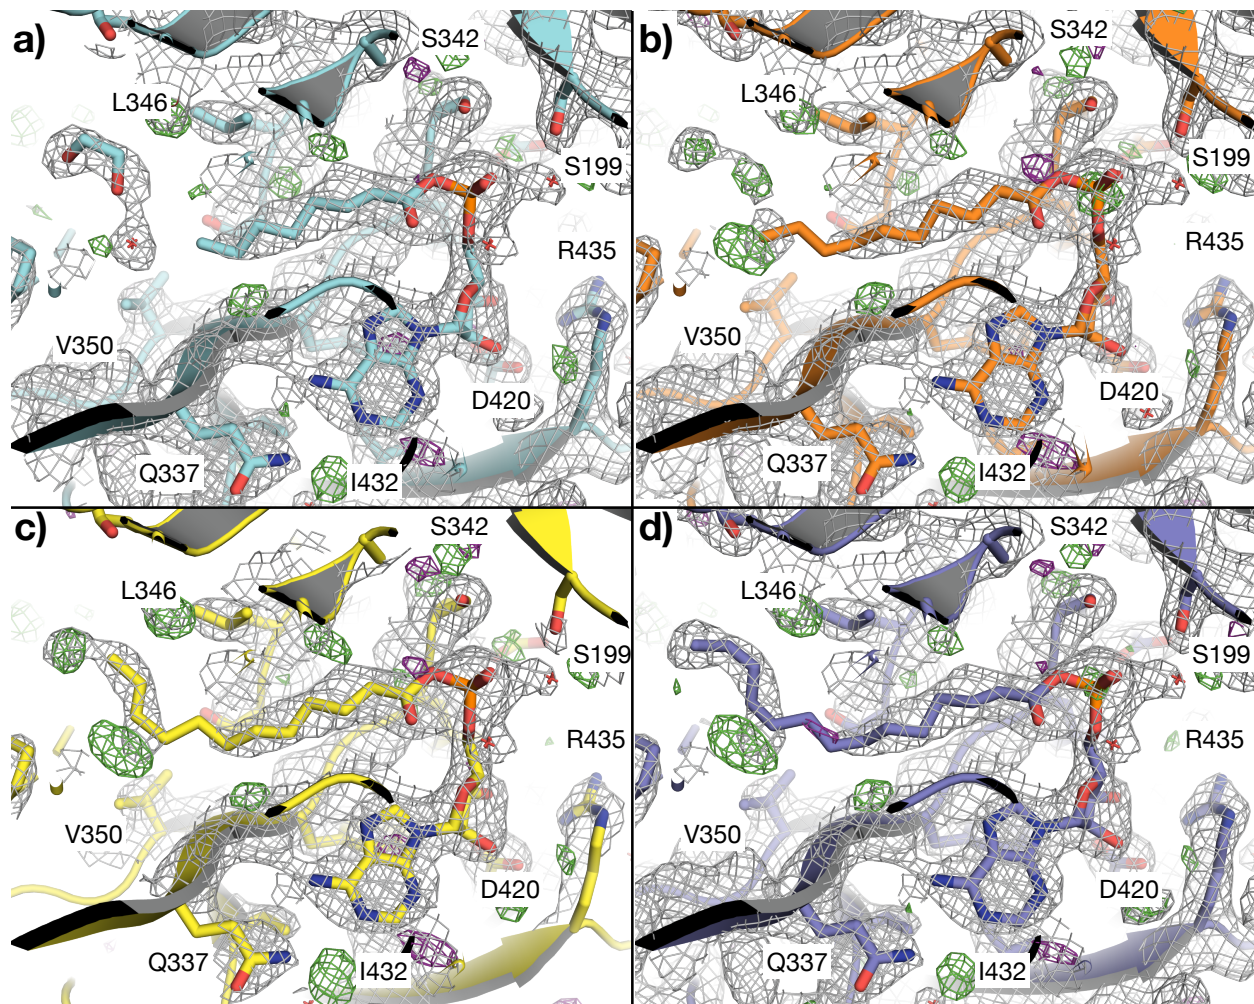

**Supplementary Figure S3: Octanoyl-AMP (C8) represents the best model for the ligand density.** (a) Octanoyl (C8), (b) Decanoyl (C10), (c) Dodecanoyl (C12), and (d) Myristoyl (C14) AMP esters modeled in the active site of CG6178. CG6178 is shown in cartoon representation. The 2Fo-Fc map (grey, at  $\sigma = 1$ ) and Fo-Fc difference maps (green  $\sigma = +3.0$  and purple  $\sigma = -3.0$ ) are shown.



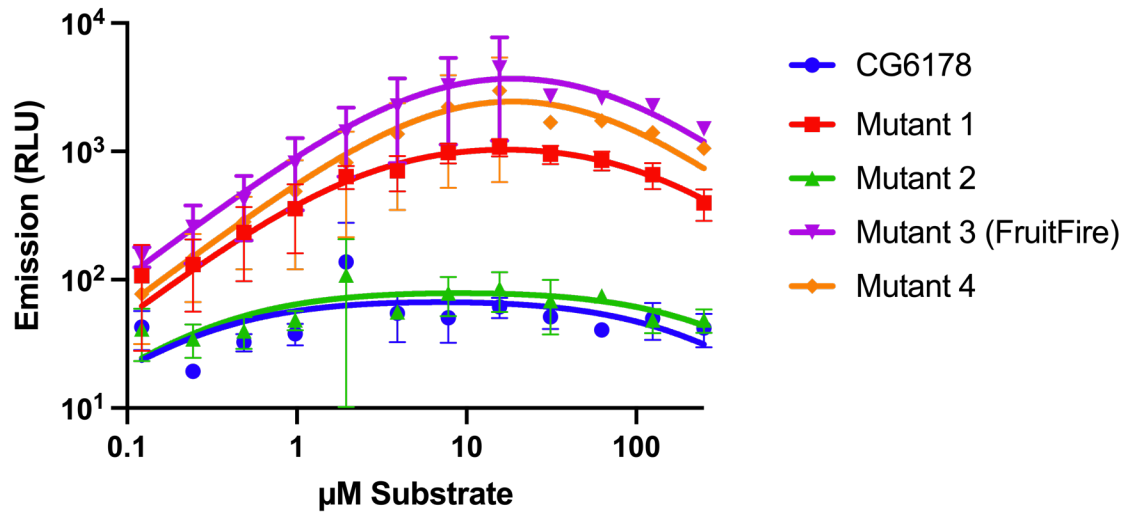

Supplementary Figure S4. *In vitro* performance of CG6178 and mutants with D-luciferin (0.122 - 250 μM). Signal from CG6178 and Mutant 2 is not above background.

A

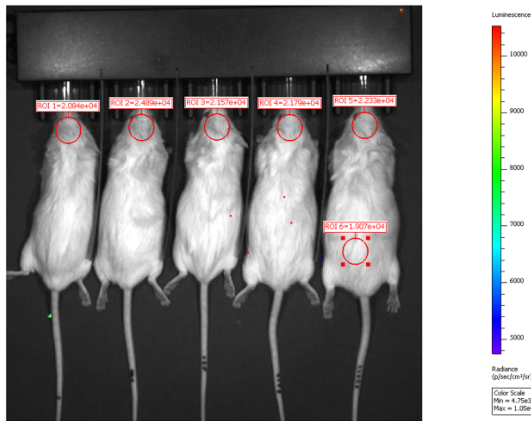

B

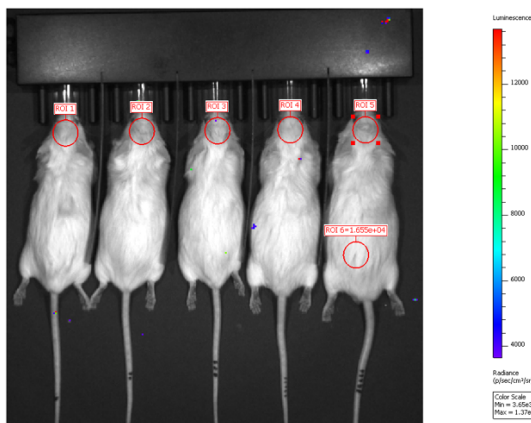

C

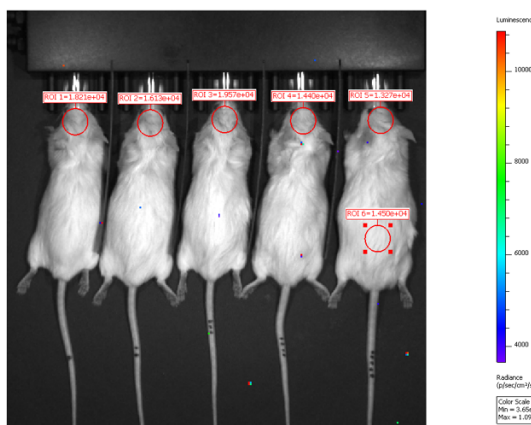

**Supplementary Figure S5. Imaging of mice transduced in the striatum with CG6178.** Mice were imaged after ip injection with A) 0.1 mL of 100 mM D-luciferin, B) 0.1 mL of 2.5 mM CycLuc2, or C) 0.1 mL of 250  $\mu$ M CycLuc2-amide.

A

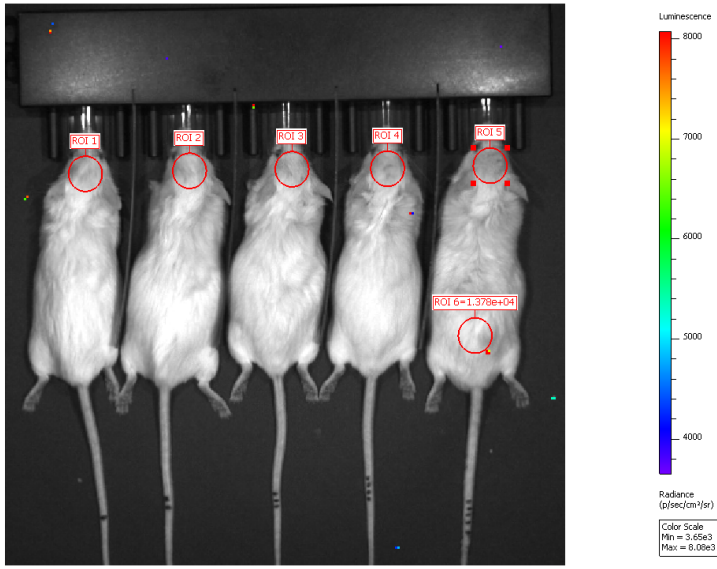

B

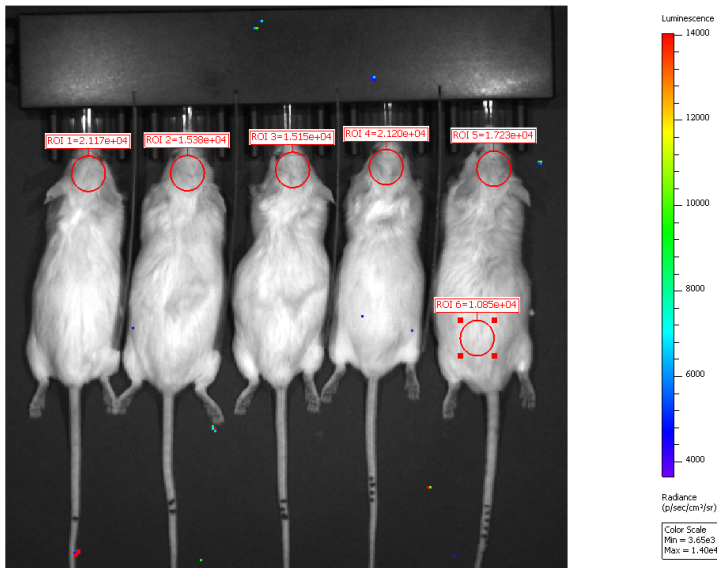

**Supplementary Figure S6. Imaging of mice transduced in the striatum with FruitFire.** Mice were imaged after ip injection with A) 0.1 mL of 100 mM D-luciferin or B) 0.1 mL of 2.5 mM CycLuc2.

**Table S1. Data collection and refinement statistics for CG6178.**

| <b>Data Collection</b>                |                                |
|---------------------------------------|--------------------------------|
| <b>Wavelength</b>                     | 1.033                          |
| <b>Resolution range</b>               | 30.72 - 2.5 (2.589 - 2.5)      |
| <b>Space group</b>                    | P 21 21 21                     |
| <b>Unit cell</b>                      | 55.851 77.778 113.315 90 90 90 |
| <b>Total reflections</b>              | 99870                          |
| <b>Unique reflections</b>             | 17673 (1726)                   |
| <b>Multiplicity</b>                   | 5.6                            |
| <b>Completeness (%)</b>               | 99.80 (99.37)                  |
| <b>Mean I/sigma(I)</b>                | 17.46 (2.95)                   |
| <b>Wilson B-factor</b>                | 36.31                          |
| <b>R-merge</b>                        | 0.104 (0.671)                  |
| <b>Refinement</b>                     |                                |
| <b>Reflections used in refinement</b> | 17660 (1724)                   |
| <b>Reflections used for R-free</b>    | 885 (87)                       |
| <b>R-work</b>                         | 0.1949 (0.2515)                |
| <b>R-free</b>                         | 0.2527 (0.3272)                |
| <b>Number of non-hydrogen atoms</b>   | 4123                           |
| <b>macromolecules</b>                 | 3988                           |
| <b>ligands</b>                        | 69                             |
| <b>solvent</b>                        | 99                             |
| <b>Protein residues</b>               | 534                            |
| <b>RMS(bonds)</b>                     | 0.002                          |
| <b>RMS(angles)</b>                    | 0.50                           |
| <b>Ramachandran favored (%)</b>       | 95.53                          |
| <b>Ramachandran allowed (%)</b>       | 4.72                           |
| <b>Ramachandran outliers (%)</b>      | 0.75                           |
| <b>Rotamer outliers (%)</b>           | 1.67                           |
| <b>Clashscore</b>                     | 15.16                          |
| <b>Average B-factor</b>               | 38.72                          |
| <b>macromolecules</b>                 | 38.72                          |
| <b>ligands</b>                        | 42.50                          |
| <b>solvent</b>                        | 37.28                          |

Statistics for the highest-resolution shell are shown in parentheses.

<sup>b</sup> $R$ -merge =  $\sum |I - \langle I \rangle| / \sum I$ , where  $I$  = observed intensity,  $\langle I \rangle$  = average intensity over symmetry equivalent; values in parentheses are for the highest resolution shell.

<sup>c</sup>RMSD, root mean square deviation.

<sup>d</sup> $R$ -work =  $\sum ||F_o| - |F_c|| / \sum |F_o|$ .

<sup>e</sup> $R$ -free was calculated from 5% of reflections, chosen randomly, which were omitted from the refinement process
